# Supplementary material for: Serum Interleukin-4 and Ascitic CD206 Predict Mortality in Acute Cirrhosis Decompensation and Acute-on-Chronic Liver Failure
Source: Research Square preprint supplement (doi:10.21203/rs.3.rs-7049789/v1), 2025-07-22

**Article title:** Serum Interleukin-4 and Ascitic CD206 Predicts Mortality in Acute Cirrhosis Decompensation and Acute-on-Chronic Liver Failure.

**Journal name:** Indian Journal of Gastroenterology.

**Author names:** Sameh A. Lashen , Perihan Salem, Esraa Ibrahim, DaliaAbd Elmoaty, Walid I. Yousif.

***Corresponding author:**

Sameh A. Lashen (MD), [ORCID: 0000-0002-8599-1338], Assistant professor, Internal Medicine Department (Hepatology & Gastroenterology Division), Faculty of Medicine, Alexandria University, Champollion Street, El-Khartoum Square, Azarita, Alexandria, 21521, Egypt. Contact: [sameh.lashen@alexmed.edu.eg](mailto:sameh.lashen@alexmed.edu.eg), telephone: (+20)127 4117 543.

**Supplementary figure legends:**

**Supplementary Fig. 1**: Study flow chart. Ascitic AD: Acute decompensation, ascitic ACLF: Acute –on chronic liver failure, HCC: Hepatocellular carcinoma.

**Supplementary Fig. 2**: The overall mortality over six months among patients with acute decompensation (AD), patients with acute-on-chronic liver failure (ACLF), and the control group.

Suppl. Table 1:

**Supplementary table 2: comparison between patients with and without sepsis as regards serum IL-4 and ascitic sCD206:**

|  | **All patients**  **(*n = 90*)** | | **Acute decompensation**  **(*n* = 30)** | | **Acute on chronic liver failure**  **(*n* = 30)** | |
| --- | --- | --- | --- | --- | --- | --- |
| **Sepsis** | **Yes (n = 18)** | **No (n = 72)** | **Yes (n = 8)** | **No (n = 22)** | **Yes (n = 10** | **No (n = 20)** |
| **Serum IL-4** #  **(pg/ml)** | 0.21 – 11.58 (4.49) | 0.06 – 16.82  (1.14) | 0.21 – 11.28  (1.08) | 0.29 – 6.52  (0.98) | 5.28 – 11.58  (10.09) | 1.03 – 16.82  (13.27) |
| **P*** | 0.21 | | 0.57 | | 0.17 | |
| **Ascitic sCD206** #  **(ng/ml)** | 2.99 – 54.22 (16.35) | 0.20 – 59.70 (11.20) | 2.99 – 49.77  (14.22) | 1.40 – 33.47  (13.80) | 24.0 – 54.22  (37.28) | 4.23 – 59.70  (33.90) |
| **P*** | 0.14 | | 0.88 | | 0.42 | |

***** *P for Mann-Whitney test*

# Data expressed as minimum – maximum (median)

**Supplementary table 2: Univariate analysis for predictors for in-hospital mortality and 3 months mortality among AD+ACLF patients: (n = 60)**

|  | **One month mortality** | | | | **3 months mortality** | | | |
| --- | --- | --- | --- | --- | --- | --- | --- | --- |
| **Baseline parameters** | **Died**  ***n* = 28** | **Alive**  ***n* = 32** | **P*** | **95% CI** | **Died**  ***n* = 36** | **Alive**  ***n* = 24** | **P*** | **95% CI** |
| **Age** | 59.45±13.62 | 56.74±17.29 | 0.50 | -5.30 – 10.72 | 60.08±12.45 | 55.00±19.30 | 0.25 | -3.78 – 14.21 |
| **Male gender** | 14 (50) | 14 (43.75) | 0.63 a | - | 18 (50) | 10 (41.7) | 0.61 a | - |
| **CTP score** | 11.92±1.68 | 10.66±1.17 | 0.002 | 0.51 – 2.04 | 11.75±1.59 | 10.50±1.18 | 0.002 | 0.48 – 2.01 |
| **MELD-Na** | 34.42±8.95 | 24.84±6.90 | <0.001 | 5.40 – 13.80 | 32.72±8.89 | 24.21±7.23 | <0.001 | 4.15 – 12.88 |
| **Cr** | 3.75±2.53 | 1.72±1.16 | <0.001 | 1.03 – 3.02 | 3.39±2.37 | 1.60±1.18 | <0.001 | 0.86 – 2.72 |
| **MAP** | 82.3±12.78 | 83.60±12.24 | 0.68 | -7.80 – 5.14 | 82.03±13.33 | 84.37±11.00 | 0.48 | -8.90 – 4.24 |
| **Platelets x103** b | 14 – 551 (96) | 26 – 478 (93) | 0.11c | 0.10-0.12 | 14 – 551 (96) | 26 – 478 (91) | 0.29 c | 0.28 – 0.31 |
| **Albumen** | 2.52±0.53 | 2.75±0.55 | 0.10 | -0.51 – 0.05 | 2.55±0.56 | 2.78±0.51 | 0.11 | -0.50 – 0.05 |
| **Bilirubin** b | 1.8 – 35.1 (9.85) | 0.6 – 2.4 (3.90) | <0.001c | - | 1.7 – 35.1 (9.45) | 0.6 – 2.4 (2.85) | <0.001 | - |
| **INR** | 2.28±0.87 | 1.72±0.37 | 0.003 | 0.21 – 0.93 | 2.15±0.83 | 1.72±0.36 | 0.01 | 0.11 – 0.74 |
| **Serum IL-4** b | 2.74 – 16.82 (11.43) | 0.21 – 14.10 (1.10) | <0.001 c | - | 2.74 – 16.82 (10.33) | 0.21 – 13.27 (0.86) | <0.001 | - |
| **Ascitic CD206** b | 14.22 – 59.70 (39.70) | 1.40 – 37.28 (11.91) | <0.001c | - | 11.6 – 59.7 (33.35) | 1.40 – 19.24 (8.65) | <0.001 | - |

CI: Confidence interval; CTP: Child-Turcotte-Pugh; Cr: Creatinine; INR: International normalization ratio; IL-4: Interleukin -4; MAP: Mean arterial pressure; MELD: Model of end-stage liver disease; OR: Odd’s ratio.

*P for independent sample t-test

a: chi-square test

b: data expressed as minimum-maximum (median)

c: Mann-Whitney test

Supplementary Fig. 1


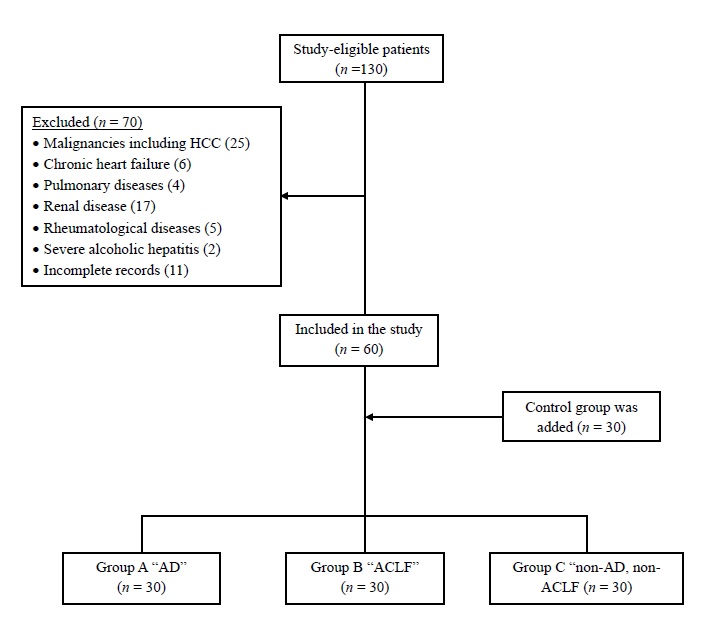


Supplementary fig.2


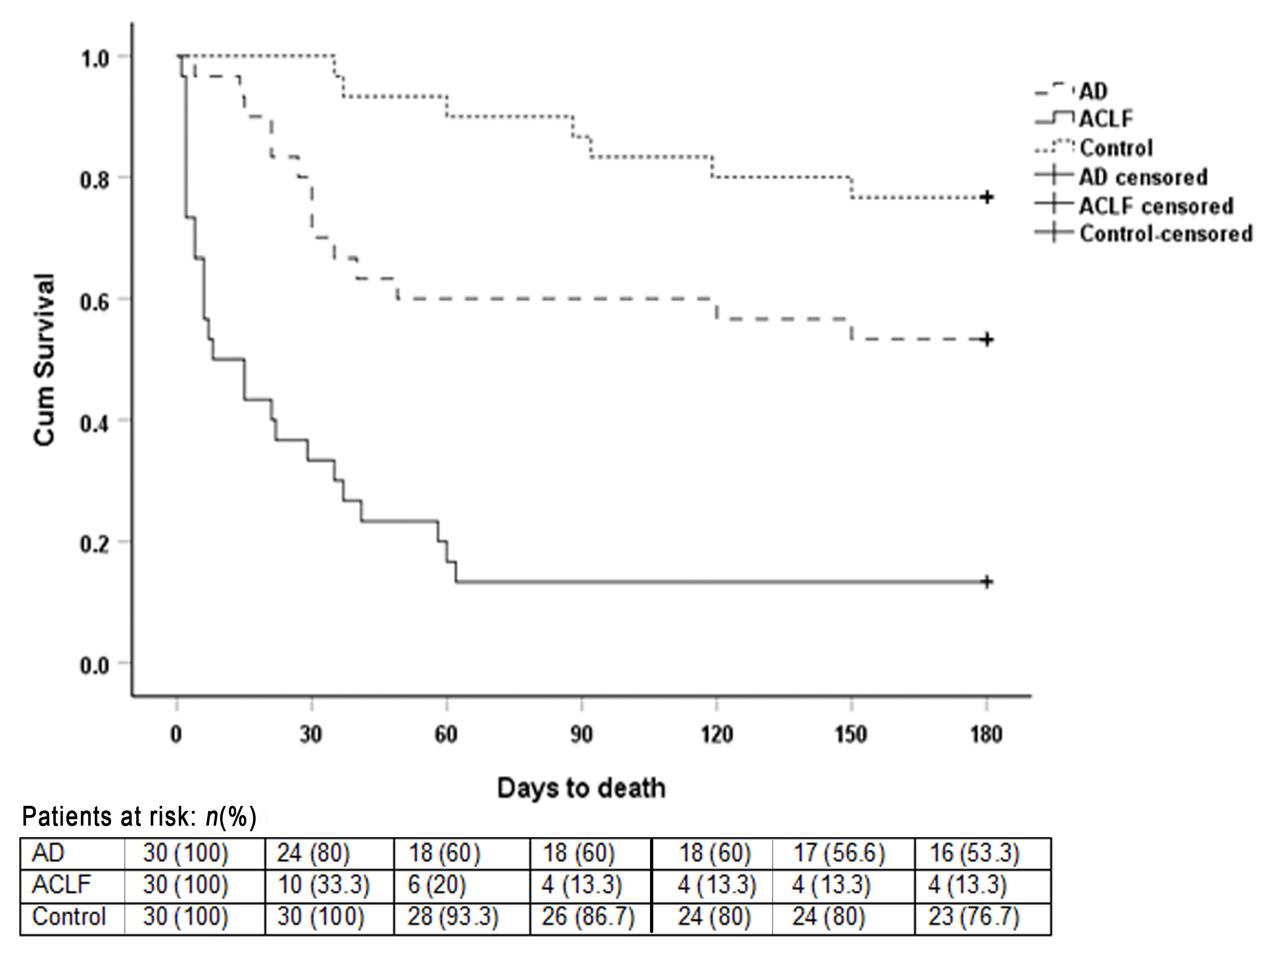

Supplement: Supplementary file 1 [file 455a6a8433a125d7175f0ea2.docx]
